# Supplementary material for: Cyclones enhance the transport of sea spray aerosols to the high atmosphere in the Southern Ocean
Source: Copernicus journal article supplement (doi:10.5194/acp-23-10349-2023), 2023-09-19
Supplement: Supplementary file 1 [file acp-23-10349-2023-supplement.pdf]

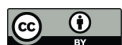

*Supplement of*

## **Cyclones enhance the transport of sea spray aerosols to the high atmosphere in the Southern Ocean**

**Jun Shi et al.**

*Correspondence to:* Jinpei Yan ([jpyan@tio.org.cn](mailto:jpyan@tio.org.cn))

The copyright of individual parts of the supplement might differ from the article licence.

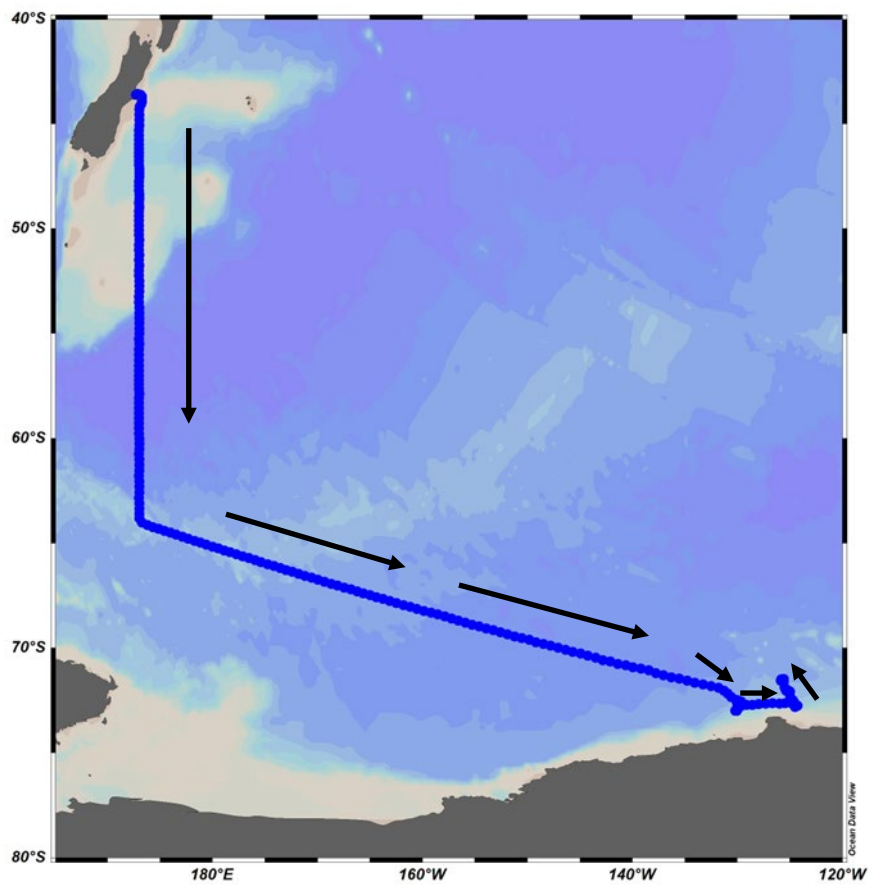

**Fig. S1 The cruise tracks of the observation.**  
**(The black arrow shows the direction of the research ship)**

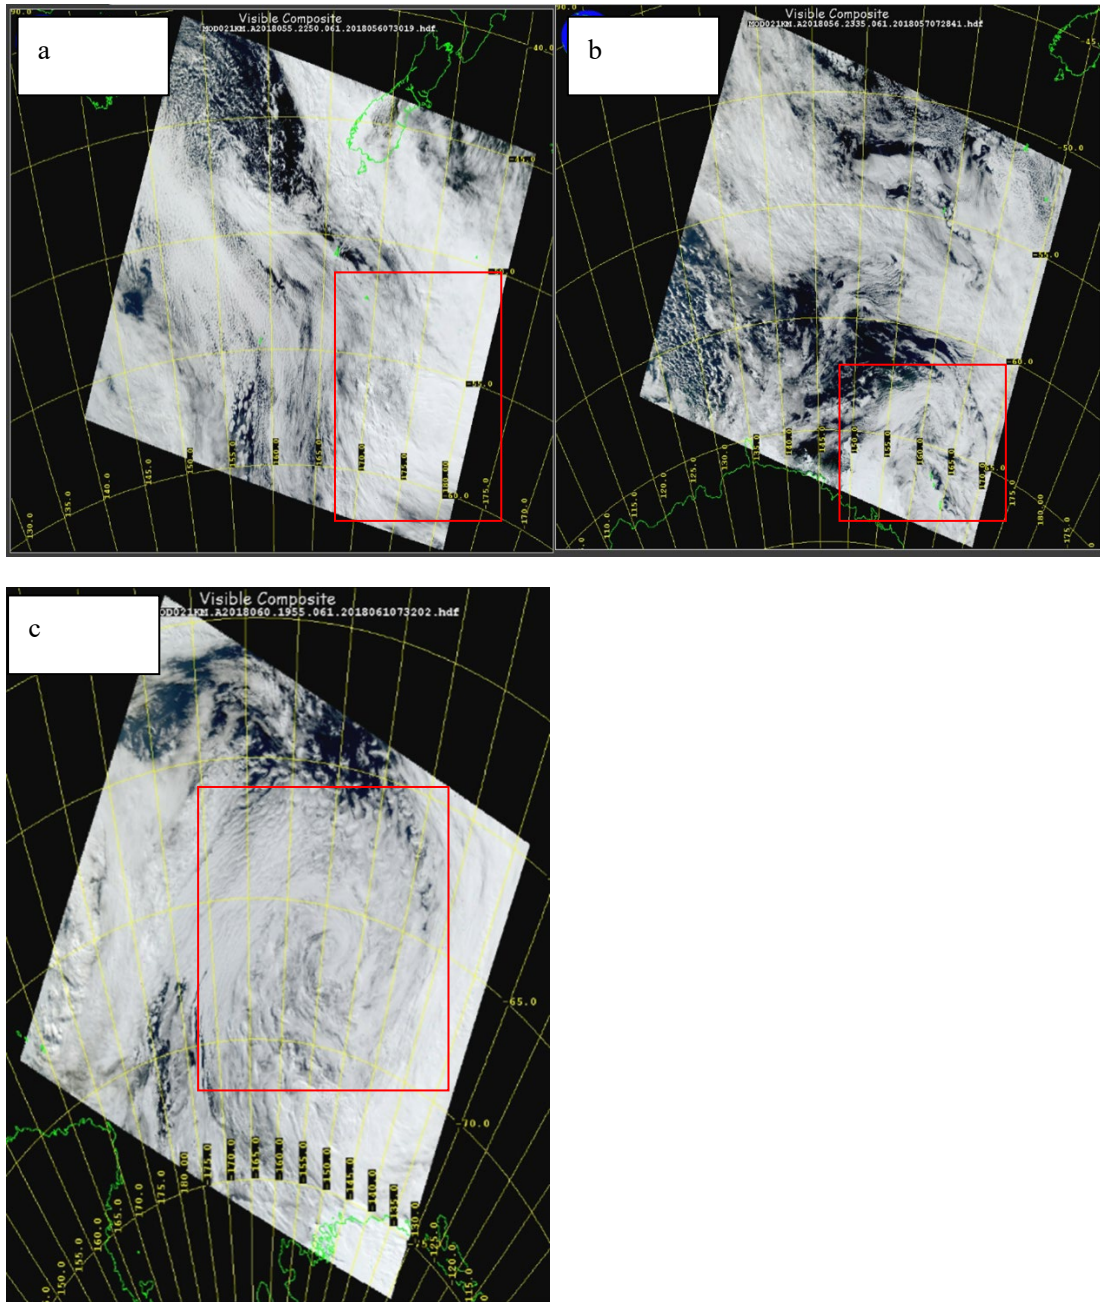

Fig. S2 The satellite cloud map of three events (a) event 1 (b) event 2 (c) event 3. (LAADS DAAC data product MOD021KM. <https://ladsweb.modaps.eosdis.nasa.gov/>)

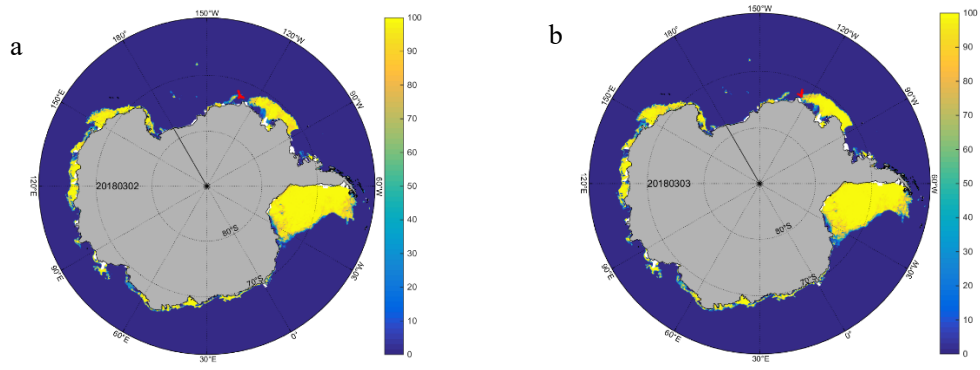

**Fig. S3 Average sea ice concentrations in the Southern Ocean, Antarctica during event 3, (a) 2 March (b) 3 March.**

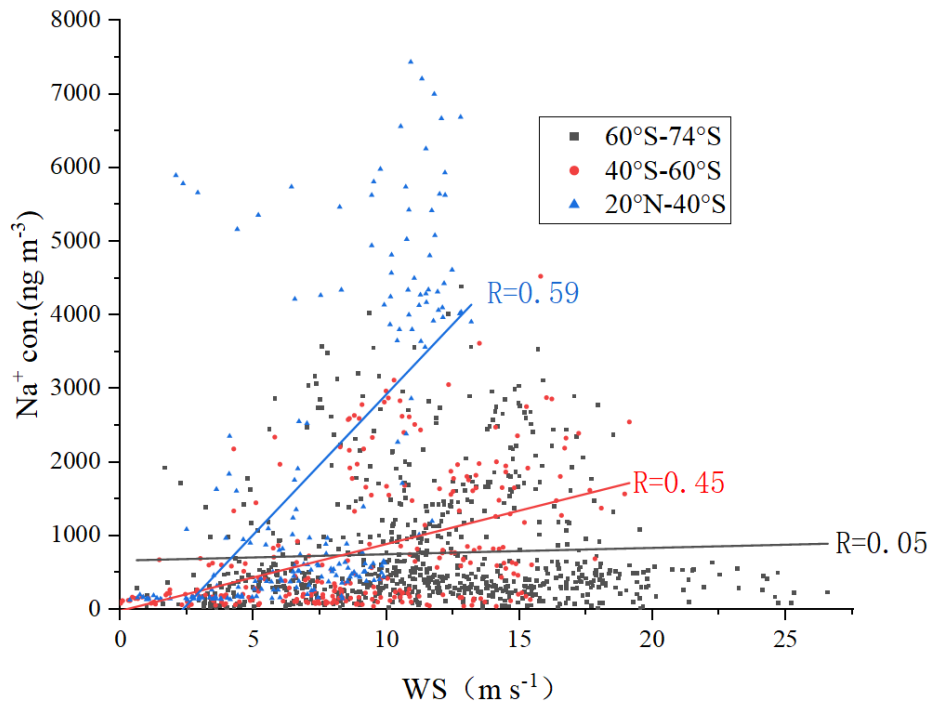

**Fig. S4 Correlation between  $\text{Na}^+$  and wind speed in regions of different latitude.**

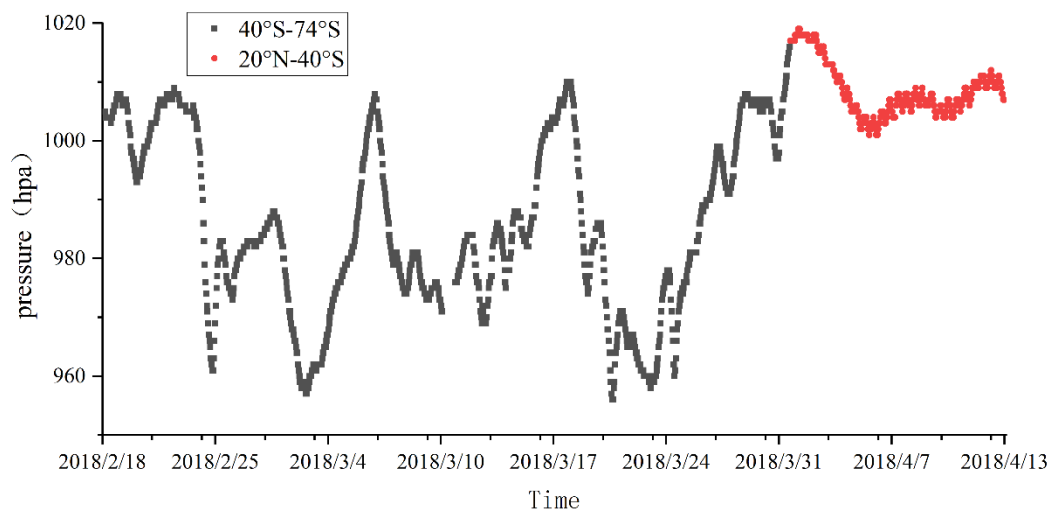

**Fig S5. Temporal distributions of pressure during the cruise.**

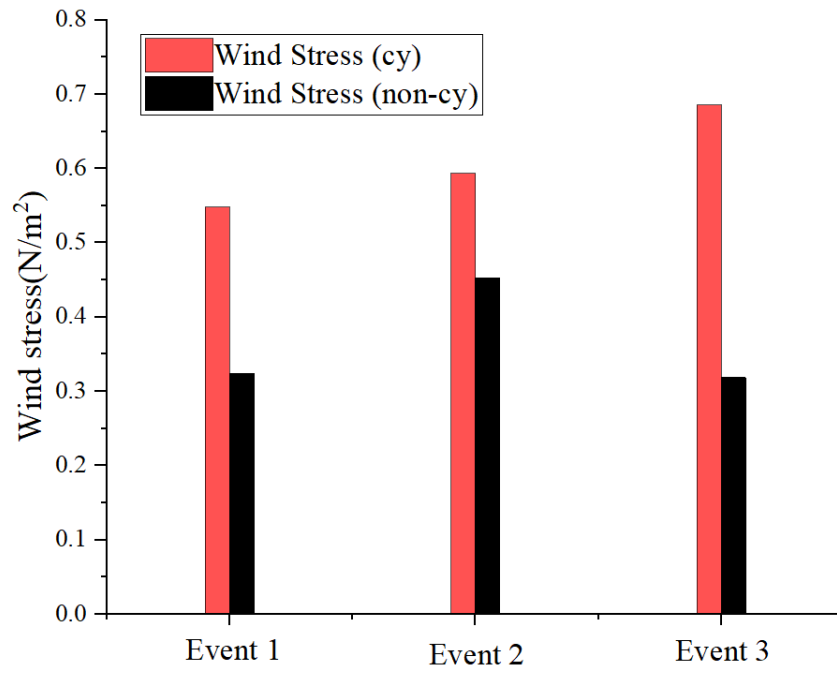

**Fig. S6** The difference of wind stress between cyclonic and non-cyclonic periods

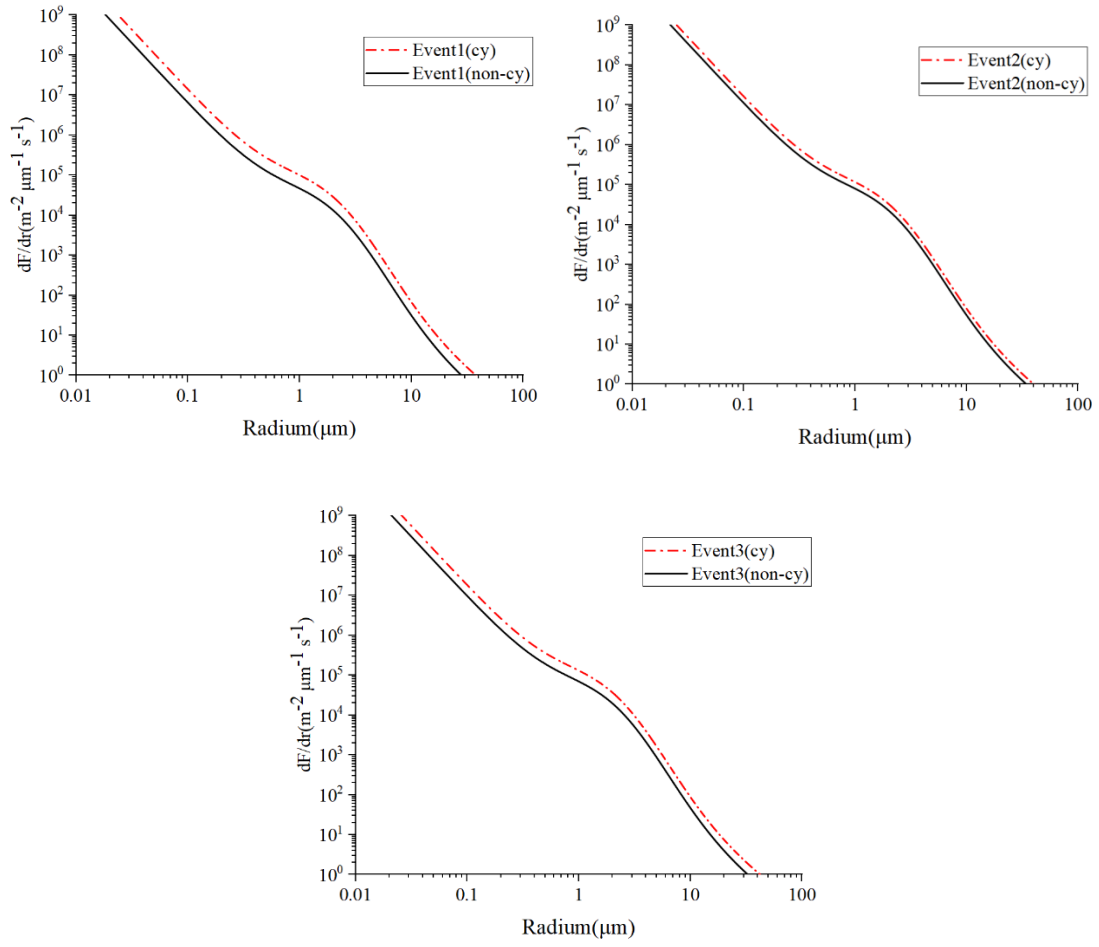

**Fig. S7** The difference of wind stress and Sea-salt flux between cyclonic and non-cyclonic periods



**Tab. S1 Correlation Coefficients Between element of Sea Spray Aerosol in the Atmospheric Aerosols Recorded in This Study. \*\*Coefficients at 0.01 Significance Level, P < 0.01.**

|                               | Na <sup>+</sup> | Mg <sup>2+</sup> | K <sup>+</sup> | Ca <sup>2+</sup> | SO <sub>4</sub> <sup>2-</sup> |
|-------------------------------|-----------------|------------------|----------------|------------------|-------------------------------|
| Na <sup>+</sup>               | 1               | .997**           | .950**         | .597**           | .892**                        |
| Mg <sup>2+</sup>              | .997**          | 1                | .956**         | .598**           | .891**                        |
| K <sup>+</sup>                | .950**          | .956**           | 1              | .689**           | .838**                        |
| Ca <sup>2+</sup>              | .597**          | .598**           | .689**         | 1                | .496**                        |
| SO <sub>4</sub> <sup>2-</sup> | .892**          | .891**           | .838**         | .496**           | 1                             |

**Tab. S2 Relative fraction of SSAs size distribution in different case during key events.**

| Da( $\mu\text{m}$ ) | Normal | Event1      |         | Event2      |         | Event3      |         |
|---------------------|--------|-------------|---------|-------------|---------|-------------|---------|
|                     |        | Non-cyclone | Cyclone | Non-cyclone | Cyclone | Non-cyclone | Cyclone |
| <1                  | 16.9%  | 28.9%       | 16.3%   | 10.0%       | 6.2%    | 24.3%       | 19.1%   |
| 1.1-1.2             | 26.1%  | 20.8%       | 22.2%   | 15.8%       | 13.7%   | 19.8%       | 19.6%   |
| 1.3-1.4             | 24.8%  | 21.6%       | 26.9%   | 26.4%       | 25.2%   | 21.7%       | 24.1%   |
| 1.5-1.6             | 17.3%  | 15.2%       | 20.7%   | 23.0%       | 26.9%   | 16.2%       | 20.3%   |
| 1.7-1.8             | 9.0%   | 8.7%        | 10.6%   | 14.4%       | 17.2%   | 10.4%       | 11.2%   |
| 1.9-2.0             | 3.9%   | 3.5%        | 2.7%    | 7.1%        | 7.9%    | 4.9%        | 4.2%    |
| > 2                 | 2.1%   | 1.34%       | 0.5%    | 3.3%        | 3.0%    | 2.7%        | 3.1%    |
